# Supplementary figures and images for: ANLN is a prognostic biomarker independent of Ki-67 and essential for cell cycle progression in primary breast cancer
Source: Springer Nature journal article supplement (doi:10.1186/s12885-016-2923-8), 2016-11-18

T47D

3 days

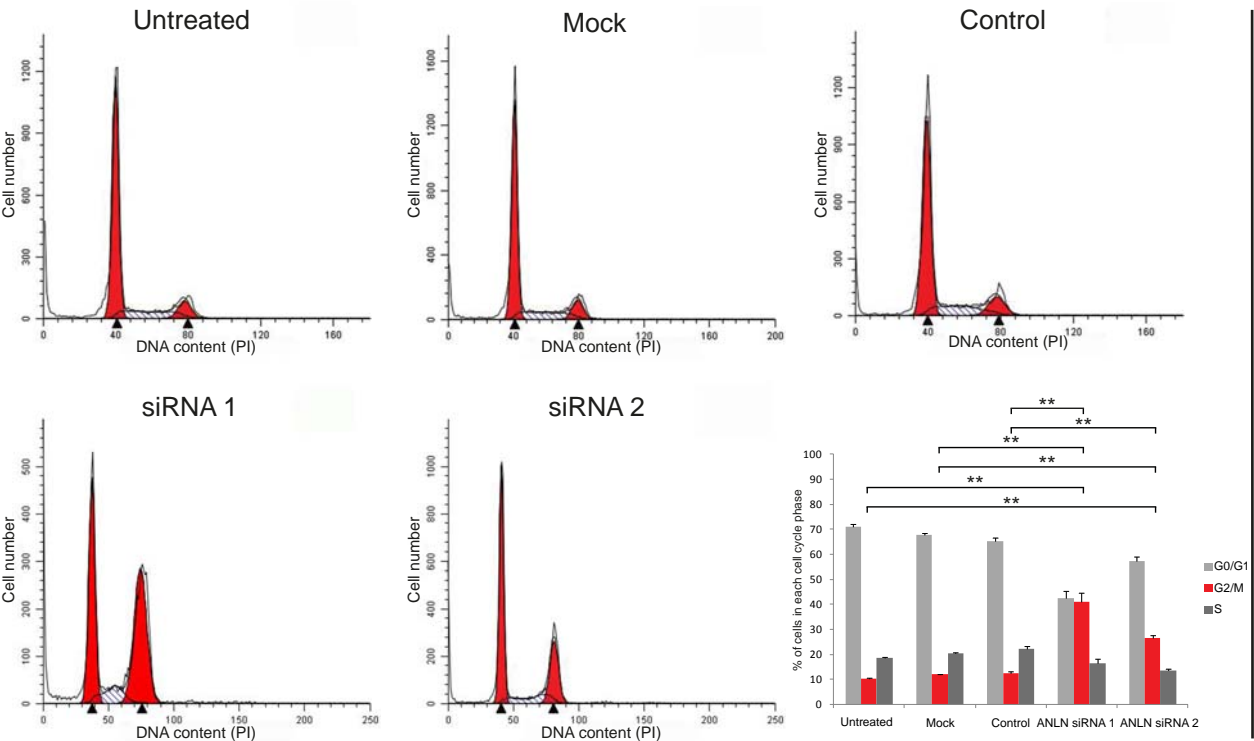

5 days

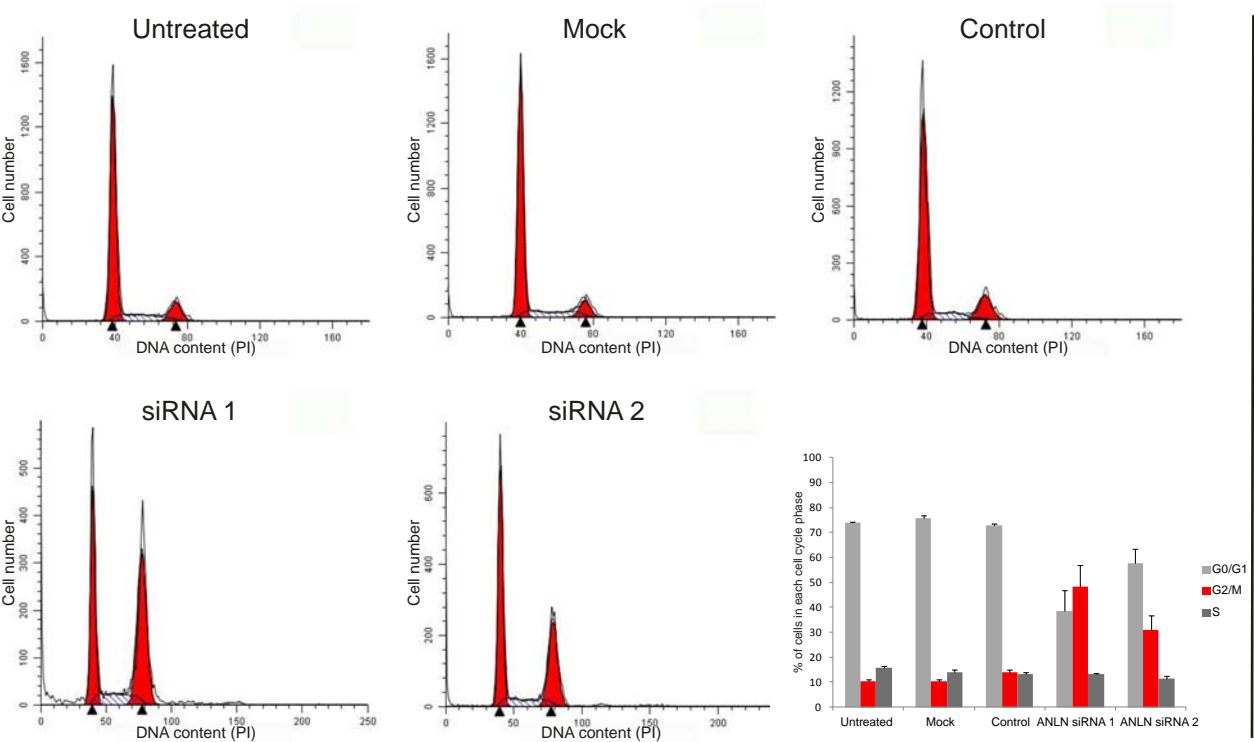

Supplement: MOESM3 [file 11063012]

SKBR3

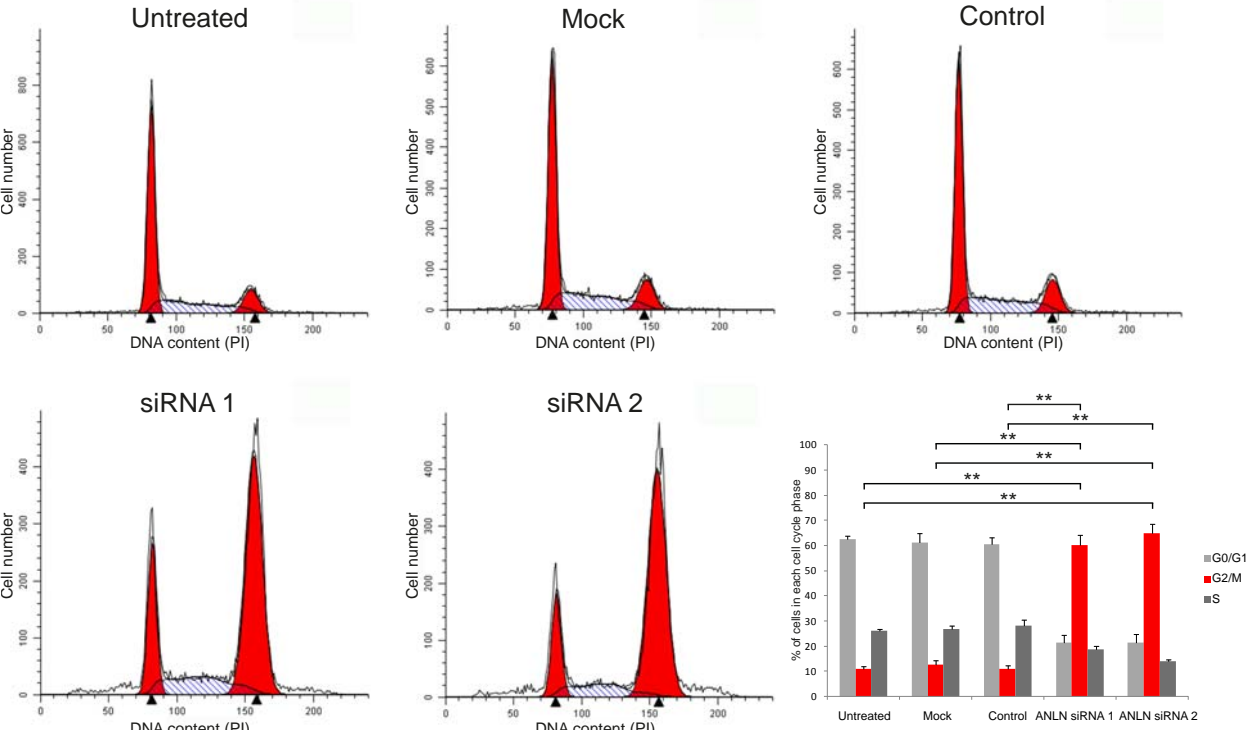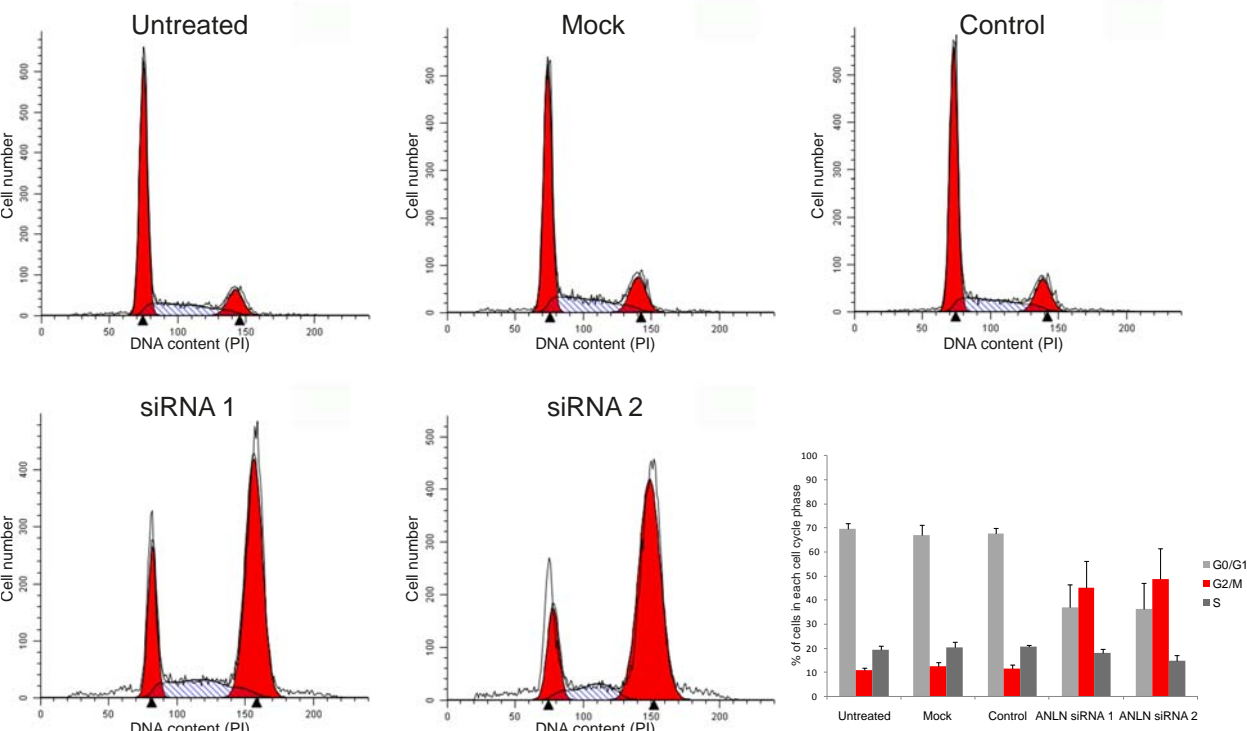

Supplement: MOESM3 [file 11063012]
